# Supplementary material
Source: PubMed Central journal article supplement (PMC4524120)
Supplement: MCB.00380-15_zmb999100902so1.pdf [file MCB.00380-15_zmb999100902so1.pdf]

**Supplementary Table 1.** Morphometry, echocardiography and hemodynamics in 3 month old male WT and *Pcyt2*<sup>+/-</sup> mice.

|                           | <b>3 month<br/>WT<br/>Male</b> | <b>3 month<br/><i>Pcyt2</i><sup>+/-</sup><br/>Male</b> |
|---------------------------|--------------------------------|--------------------------------------------------------|
| <b>N- value</b>           | 6                              | 6                                                      |
| <b>BW(g)</b>              | 29.53±0.57                     | 27.83±1.14                                             |
| <b>HW(mg)</b>             | 140.33±4.48                    | 139.25±2.72                                            |
| <b>HW:BW</b>              | 4.76±0.20                      | 4.91±0.16                                              |
| <b>HW:TL</b>              | 7.78±0.30                      | 8.63±0.57                                              |
| <b>HR (bpm)</b>           | 507.57±5.93                    | 531.46±6.77                                            |
| <b>LVIDd (mm)</b>         | 4.02±0.03                      | 4.10±0.11                                              |
| <b>LVIDs (mm)</b>         | 2.35±0.02                      | 2.45±0.12                                              |
| <b>FS (%)</b>             | 41.51±0.60                     | 40.40±1.67                                             |
| <b>EF (%)</b>             | 78.61±0.62                     | 77.20±1.84                                             |
| <b>LVESP (mmHg)</b>       | 101.21±52                      | 100.24±0.67                                            |
| <b>LVEDP (mmHg)</b>       | 0.31±0.95                      | -0.87±0.88                                             |
| <b>LDP (mmHg)</b>         | 100.89±0.99                    | 102.61±1.09                                            |
| <b>SBP (mmHg)</b>         | 97.98±2.09                     | 101.41±0.46                                            |
| <b>DBP (mmHg)</b>         | 58.87±6.19                     | 62.94±2.00                                             |
| <b>MAP (mmHg)</b>         | 71.66±4.76                     | 75.15±1.30                                             |
| <b>dp/dt max (mmHg/s)</b> | 8715.32±344                    | 9202.43±970                                            |
| <b>dp/dt min (mmHg/s)</b> | 7570.43±811                    | 8543.59±1031                                           |

p>0.05, no significant difference for all values.

Supplementary Table 2

| Compound<br>(mg/L)       | Pcyt2 <sup>+/+</sup> ± SD |           | Pcyt2 <sup>+/-</sup> ± SD |          | p value <sup>#</sup> |
|--------------------------|---------------------------|-----------|---------------------------|----------|----------------------|
| Phosphorus               | 2.362                     | ±0.2283   | 3.013                     | ± 0.245  | <b>0.028</b>         |
| CO2                      | 22.33                     | ±0.5774   | 22.67                     | ± 0.5774 | 0.5185               |
| Total Protein            | 57.67                     | ± 0.5774  | 57.67                     | ± 0.5774 | 1                    |
| Albumin                  | 40.33                     | ± 0.5774  | 38                        | ± 1      | <b>0.0249</b>        |
| Globulin                 | 17.33                     | ± 0.5774  | 19.67                     | ± 1.155  | <b>0.0352</b>        |
| Albumin:Globulin         | 2.327                     | ± 0.09713 | 1.94                      | ± 0.1587 | <b>0.0228</b>        |
| Urea                     | 6.4                       | ± 0.5292  | 6.833                     | ± 0.7506 | 0.4596               |
| Creatinine               | 10.33                     | ± 0.5774  | 9.667                     | ± 2.082  | 0.6213               |
| Cholesterol              | 5.583                     | ± 0.194   | 6.517                     | ± 0.588  | 0.0594               |
| Conjugated<br>billirubin | 0.6667                    | ± 0.5774  | 0.6667                    | ± 0.5774 | 1                    |
| Free billirubin          | 0.3333                    | ± 0.5774  | 0.3333                    | ± 0.5774 | 1                    |
| AST                      | 181.7                     | ± 38.55   | 179                       | ± 38.2   | 0.5045               |
| ALT                      | 125.7                     | ± 36      | 144.3                     | ± 25.54  | 0.9363               |
| CK                       | 154.7                     | ± 48.18   | 142.7                     | ± 72.7   | 0.8234               |

# Significant differences at p<0.05 are shown in bold

### Supplementary Table 3: Primers used for gene expression analysis

|                                |                             |
|--------------------------------|-----------------------------|
| <i>Pcyt2</i> WT forward primer | CCTGGAACTCATGAGATCCTTCTG    |
| <i>Pcyt2</i> WT reverse primer | ATCGCACCACACCCGCACGA        |
| <i>Pcyt2</i> KO reverse primer | TGCGAGGCCAGAGGCCACTTGTGTAGC |
| <i>Myh6</i> forward primer     | GATTGGTCTCCCAGCCTCTG        |
| <i>Myh6</i> reverse primer     | TCTTGTCGAACTTGGGTGGG        |
| <i>Acta 1</i> forward primer   | CTAGACACCATGTGCGACGA        |
| <i>Acta 1</i> reverse primer   | TCCCAGTTGGTGATGATGCC        |
| <i>Nppa</i> forward primer     | TCCTCGTCTTGGCCTTTTGG        |
| <i>Nppa</i> reverse primer     | CAATCCTACCCCCGAAGCAG        |
| <i>Myh7</i> forward primer     | TCCTGCTGTTTCCTTACTTGC       |
| <i>Myh7</i> reverse primer     | GGTAAGCCCAGGCCTGTAGA        |
| <i>Hsl</i> forward primer      | ACGCTACACAAAGGCTGCTT        |
| <i>Hsl</i> reverse primer      | TCGTTGCGTTTGTAGTGCTC        |
| <i>Atgl</i> forward primer     | CAACGCCACTCACATCTACGG       |
| <i>Atgl</i> reverse primer     | GGACACCTCAATAATGTTGGCAC     |
| <br>                           |                             |
| <i>Lpl</i> forward primer      | GCTCGCACGAGCGCTCCATT        |
| <i>Lpl</i> reverse primer      | CCTCGGGCAGGGTGAAGGGAA       |
| <i>Ppar α</i> forward primer   | GCTCACAGAATTTGCCAAGG        |
| <i>Ppar α</i> reverse primer   | GTCATCCAGTTCTAAGGCATTG      |
| <i>Gpr30</i> forward primer    | GATCGTTAGATTAACAGAGCAG      |
| <i>Gpr30</i> reverse primer    | CCTGGGAGCCTGTTAGTCTCAG      |
| <i>Mct1</i> forward primer     | GTGCAGCAGCCAAGGAGCCC        |
| <i>Mct1</i> reverse primer     | CCATGGCCAGTCCGTTGGCC        |
| <i>Ace</i> forward primer      | CAGGAACGTGGAACCTTGGA        |
| <i>Ace</i> reverse primer      | CTTTGACGGAAGCATCACC         |
| <i>Gapdh</i> forward primer    | ACCACAGTCCATGCCATCAC        |
| <i>Gapdh</i> forward primer    | TCCACCACCCTGTTGCTGTA        |

**Supplementary Table 4. Primer table for RAS genes for RTPCR.**

| <b>Gene</b>                                   | <b>RefSeq ID</b>                         |         | <b>Primer sequence (5' to 3')</b> | <b>Product (bp)</b> |
|-----------------------------------------------|------------------------------------------|---------|-----------------------------------|---------------------|
| <i>Angiotensin converting enzyme (Ace)</i>    | NM_207624,<br>NM_001281819,<br>NM_009598 | Forward | TATGCCCTGGAACCTGAT                | 106                 |
|                                               |                                          | Reverse | GATGGCTCTCCCCACCTT                |                     |
| <i>Angiotensinogen (Agt)</i>                  | NM_007428                                | Forward | CACCCCTGCTACAGTCCATTG             | 221                 |
|                                               |                                          | Reverse | GTCTGTACTGACCCCCTCCAG             |                     |
| <i>Angiotensin II Type 1 Receptor (Agt1r)</i> | NM_177322                                | Forward | GGAAACAGCTTGGTGGTGATC             | 236                 |
|                                               |                                          | Reverse | CTGAGACACGTGAGCAGGAAC             |                     |
| <i>Renin (Ren)</i>                            | NM_031192                                | Forward | CCTTGACCAATCTTACCTCCC             | 74                  |
|                                               |                                          | Reverse | GATGCCAATCTCGCCGTAG               |                     |
| <i>Angiotensin converting enzyme 2 (Ace2)</i> | NM_027286,<br>NM_001130513               | Forward | CAACCCAAAGAACCCACAAG              | 148                 |
|                                               |                                          | Reverse | CTCTTCATACAACGGCCTCAG             |                     |
| <i>Histone (His)</i>                          | NM_008210                                | Forward | GCAAGAGTGCGCCCTCTACTG             | 218                 |
|                                               |                                          | Reverse | GGCCTCACTTGCCTCCTGCAA             |                     |

**Figure S1, Basu et. al**

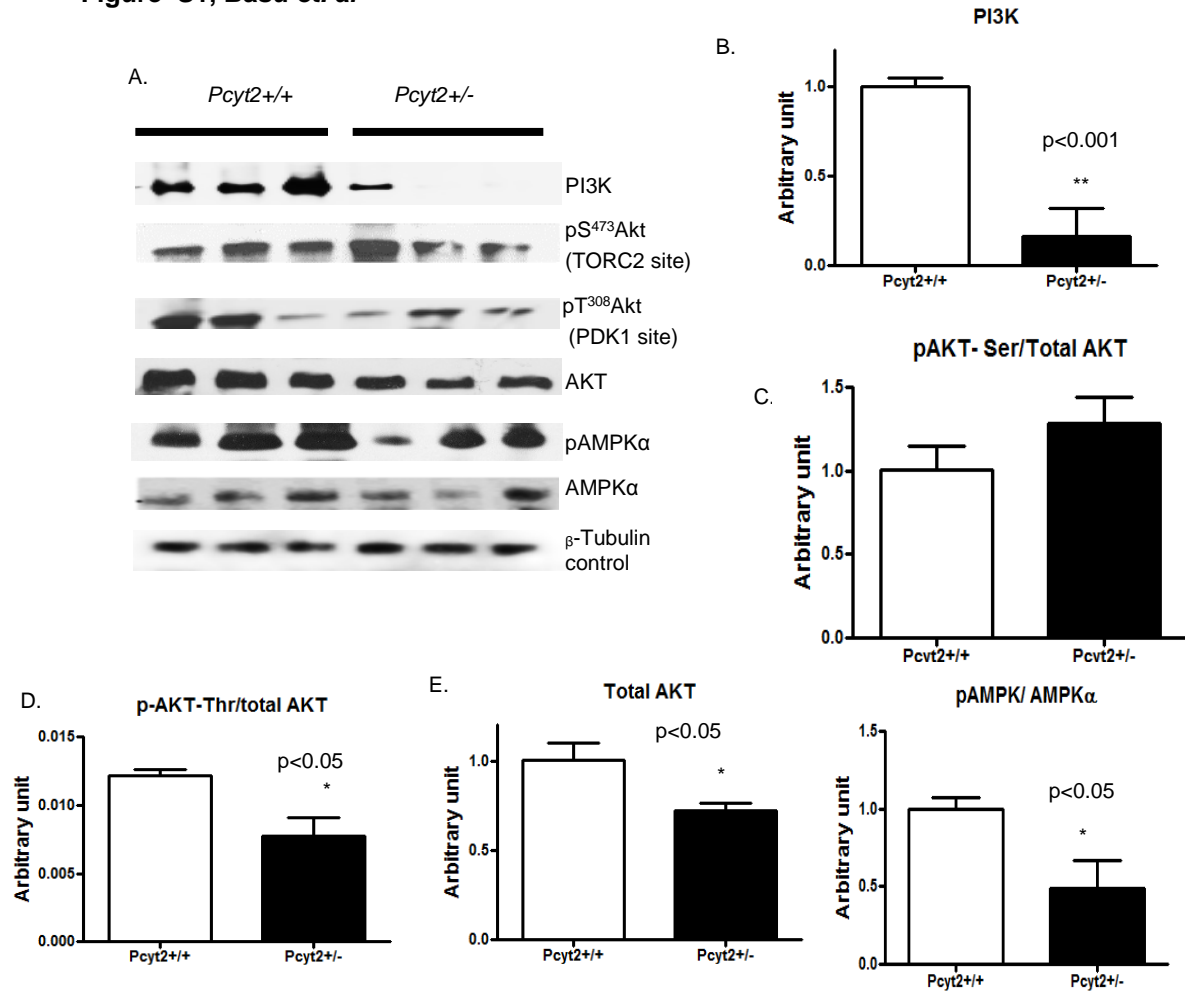

**Figure S1: The heart insulin signalling pathway of young *Pcyt2*<sup>+/-</sup> mice.** A. Immunoblots for PI3K, Akt, pS<sup>473</sup>Akt, pT<sup>308</sup>Akt, AMPK and p-AMPK in *Pcyt2*<sup>+/-</sup> and control littermate heart (n=3 in each group). B. PI3K exhibit dramatic reduction in *Pcyt2*<sup>+/-</sup> heart in comparison to control heart (n=6 per group); C. The ratio of ,pS<sup>473</sup>Akt/tAkt was not changed between the groups. D. pT<sup>308</sup>Akt/tAkt was significantly reduced in *Pcyt2*<sup>+/-</sup> heart E. The total AKT was significantly reduced in *Pcyt2*<sup>+/-</sup> heart. F. pAMPK/AMPK ratio was also significantly reduced in *Pcyt2*<sup>+/-</sup> animals in comparison to the littermate control heart. Two-tailed or one tailed Student t-tests were performed and values are mean  $\pm$  SEM.
